# Supplementary material for: Tetrapeptide–coumarin conjugate 3D networks based on hydrogen-bonded charge transfer complexes: gel formation and dye release
Source: Royal Society of Chemistry journal article supplement (doi:10.1039/c5sm00995b), 2015-01-01
Supplement: c5sm00995b1.pdf [file c5sm00995b1.pdf]

## Supporting Information

### Tetrapeptide-coumarin conjugate 3D networks based on hydrogen-bonded charge transfer complex: gel formation and dye release

Zongxia Guo, Ruiying Gong, Yi Jiang and Xiaobo Wan

#### The Synthesis of Gly-(L-Val)-Gly-(L-Val)-Coumarin conjugate

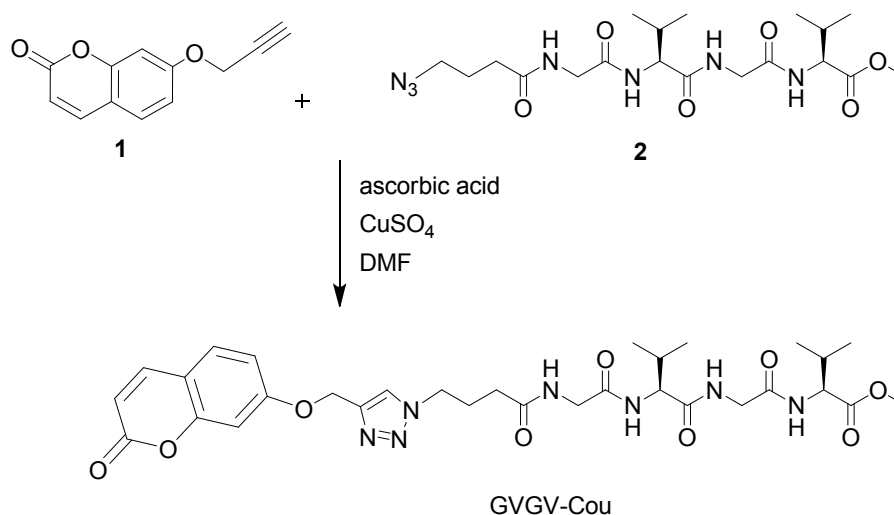

**Scheme S1** The Synthesis of Gly-(L-Val)-Gly-(L-Val)-Coumarin conjugate.

The mixture of compound **1**<sup>1</sup> (200 mg, 1 mmol) and **2**<sup>2</sup> (455 mg, 1 mmol) in 5ml DMF was stirred in the presence of a catalytic amount of CuSO<sub>4</sub>·5H<sub>2</sub>O (25 mg) and ascorbic acid (70mg) at room temperature overnight. Et<sub>2</sub>O (30 ml) was added to the mixture, and the precipitate was filtered and washed with Et<sub>2</sub>O to afford **GVGV-Cou** as a pale solid in 97% yield. <sup>1</sup>H NMR (600 MHz, DMSO-d<sub>6</sub>): 8.31 (s, 1H), 8.27 (t, *J* = 5.8, 1H), 8.12 (t, *J* = 5.8, 1H), 8.04-8.00 (m, 2H), 7.86 (d, *J* = 8.6, 1H), 7.65 (d, *J* = 8.6, 1H), 7.17 (d, *J* = 2.1, 1H), 7.04-7.02 (m, 1H), 5.26 (s, 2H), 4.40 (t, *J* = 6.8, 2H), 4.19-4.15 (m, 2H), 3.83-3.73 (m, 4H), 3.63 (s, 3H), 2.16 (t, *J* = 7.2, 2H), 2.07-2.01 (m, 4H), 0.87-0.84 (m, 12H). HR-MS(ESI) *Calcd*: 678.2858 for [M+Na<sup>+</sup>]; *Found*: 678.2858 for [M+Na<sup>+</sup>].

## The Synthesis of Gly-(L-Val)-Gly-(L-Val)-alkyl conjugate

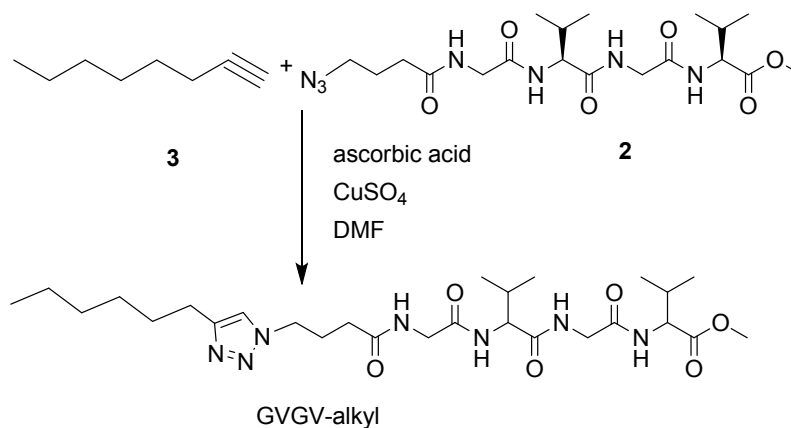

**Scheme S2** The Synthesis of Gly-(L-Val)-Gly-(L-Val)-alkyl conjugate.

The mixture of compound **3** (11 mg, 0.1 mmol) and **2** (45.5 mg, 0.1 mmol) in 5ml DMF was stirred in the presence of a catalytic amount of CuSO<sub>4</sub>·5H<sub>2</sub>O (1.7 mg) and ascorbic acid (2.5 mg) at room temperature overnight. Et<sub>2</sub>O (30 ml) was added to the mixture, and the precipitate was filtered and washed with Et<sub>2</sub>O to afford **GVGV-alkyl** as a pale solid in 99% yield. <sup>1</sup>H NMR (600 MHz, DMSO-d<sub>6</sub>): 7.65 (d, *J* = 3.9, 1H), 7.48 (m, 2H), 7.37 (s, 1H), 7.07 (m, 1H), 4.53 (m, 1H), 4.48 (m, 1H), 4.43 (m, 2H), 4.04-4.22 (m, 4H), 3.70 (s, 3H), 2.73-2.71 (t, *J* = 7.5, *J* = 3.9, 2H), 2.24 (m, 6H), 1.38 (m, 2H), 1.35 (m, 6H), 0.89-0.98 (m, 15H).

### Gel formation test in Ethanol of GVGV-alkyl

To check if the triazole affects the gel formation of GVGV-Cou in ethanol, the GVGV-alkyl has been synthesized (Scheme S2). It was found that GVGV-alkyl could not form a gel under the same condition where GVGV-Cou CT gel is formed. Then it can be suggested that triazole serves only as a linker during the formation of GVGV-Cou CT gel.

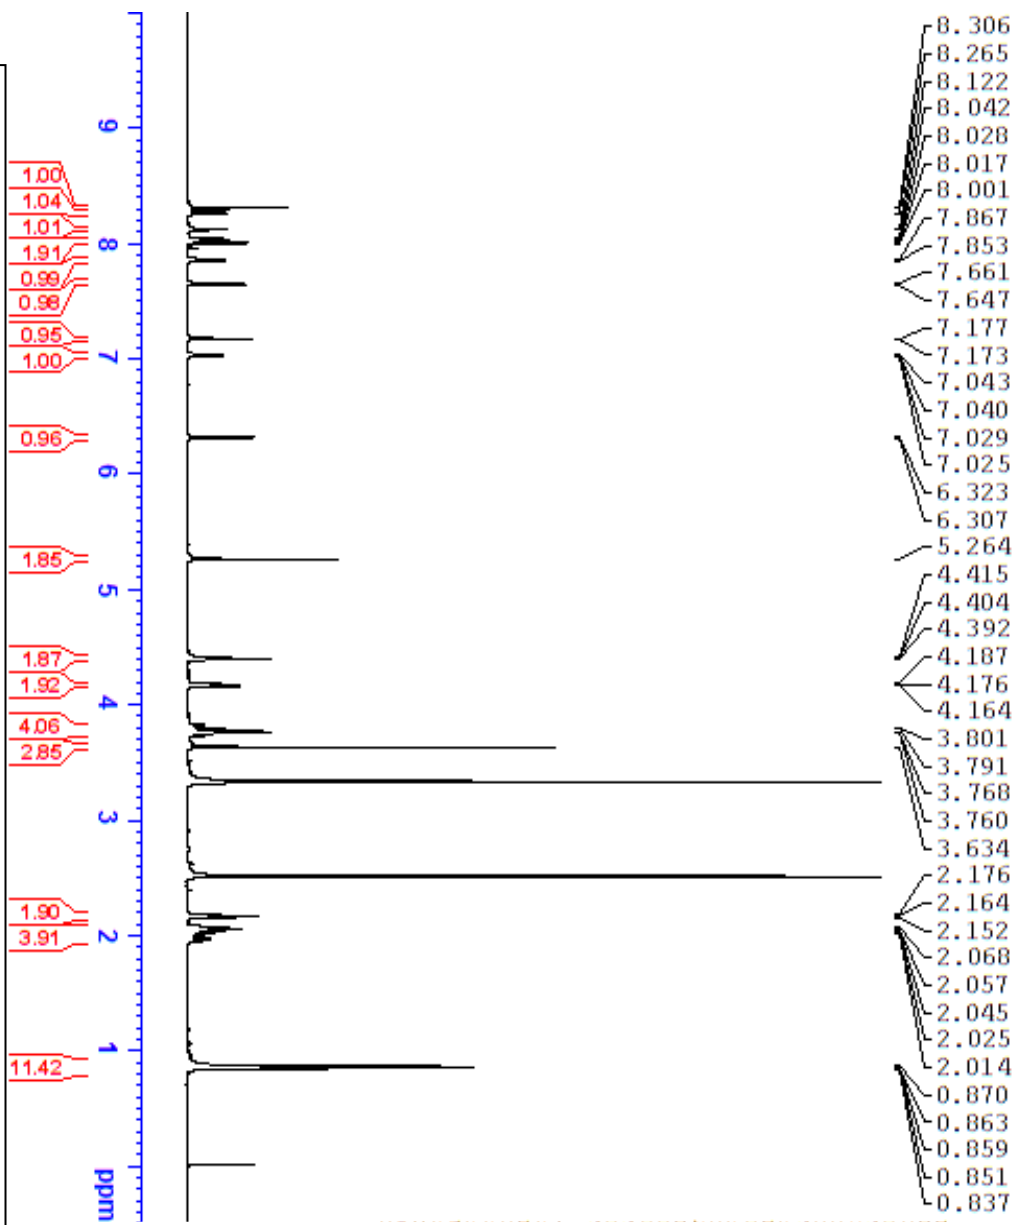

Fig. S1 The  $^1\text{H}$  NMR spectrum of GVGVCou (600MHz, DMSO- $d_6$ ).

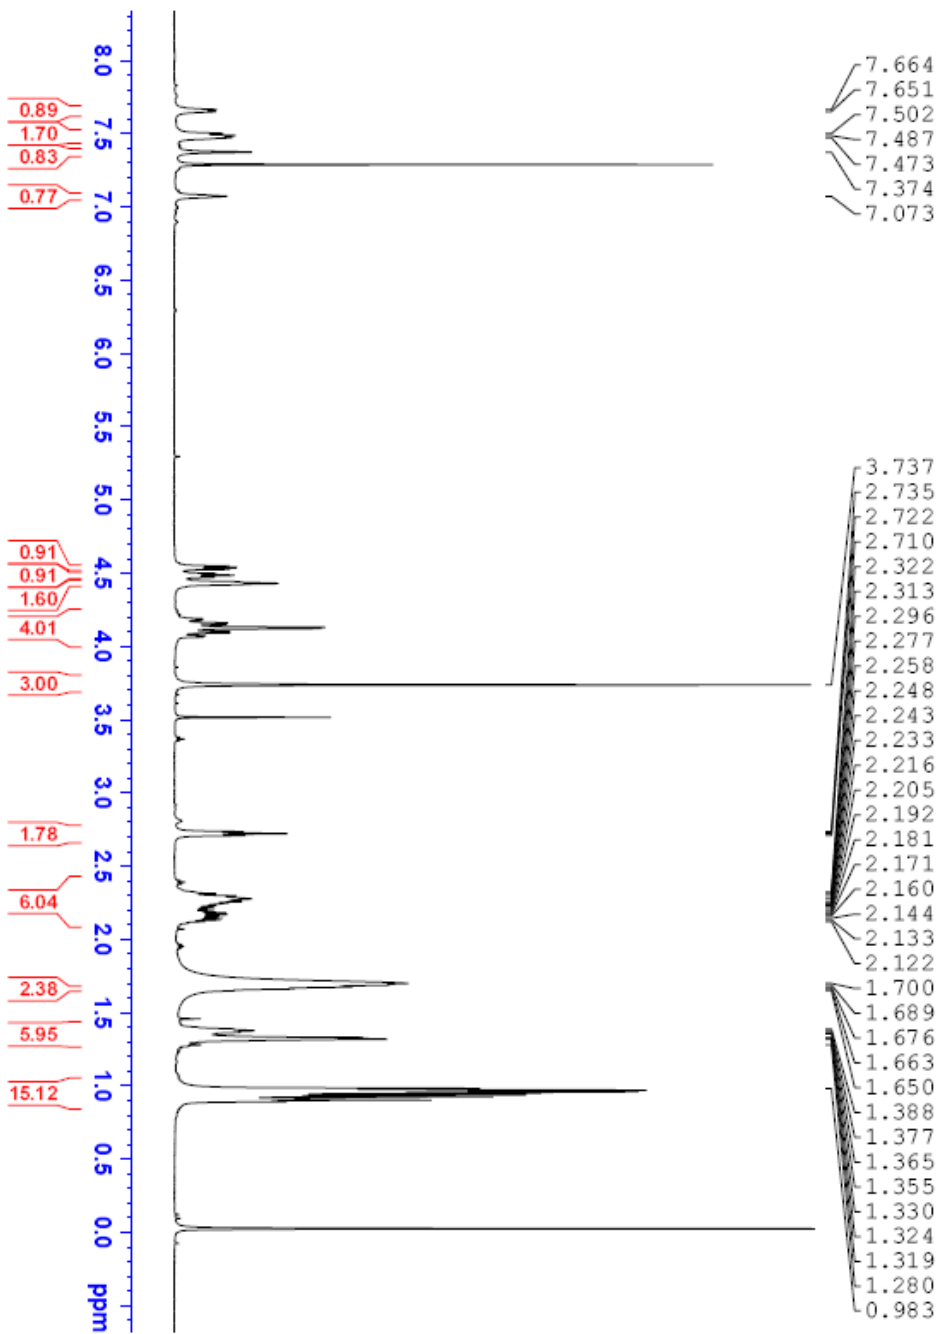

Fig. S2 The <sup>1</sup>H NMR spectrum of GVGV-alkyl (600MHz, CHCl<sub>3</sub>-d<sub>6</sub>).

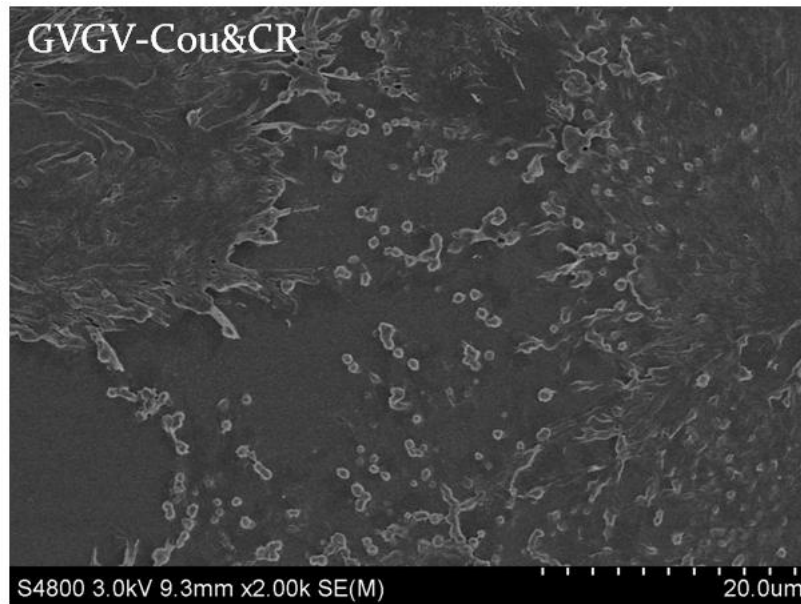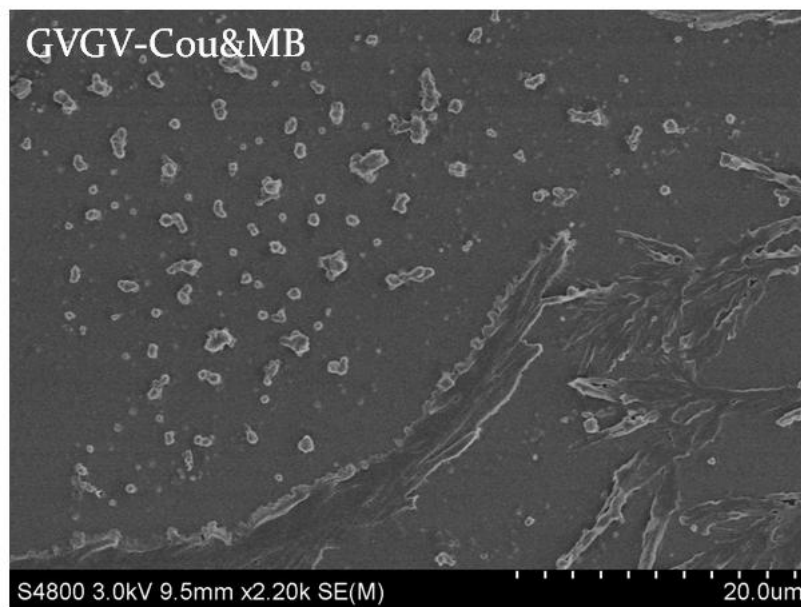

Fig. S3 SEM images of co-xerogels.

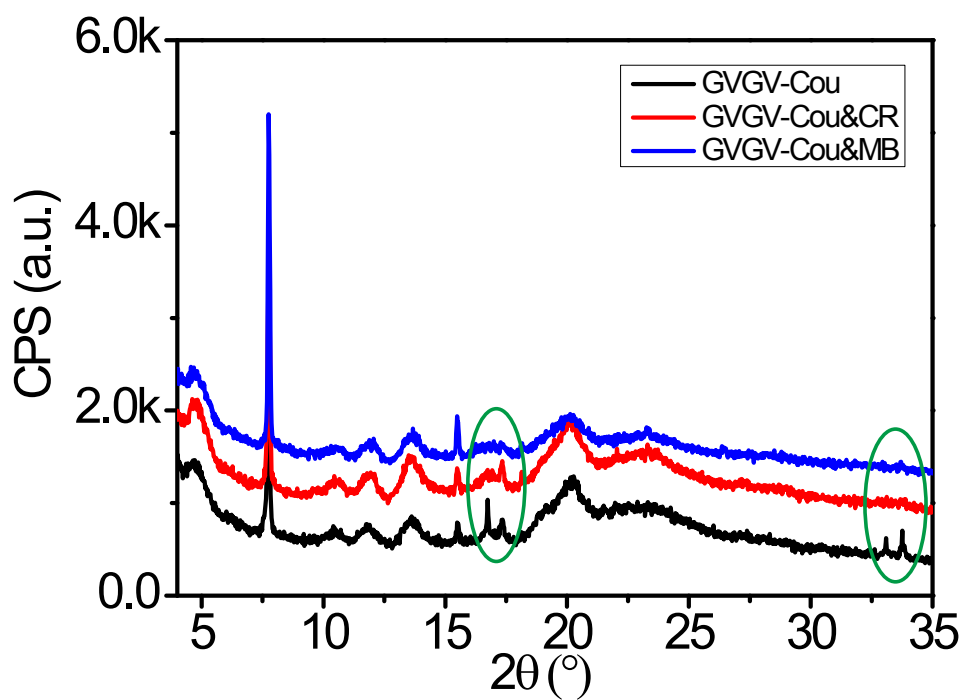

Fig. S4 XRD spectra of GVG-Cou xerogel and co-xerogels.

#### References

- (1) Y.Lin, J.Yuan, M.Hu, J.Cheng, J.Yin, S.Jin, S. H. Liu, *Organometallics* 2009, **28**, 6402-6409.
- (2) R. Gong, Y. Song, Z. Guo, M. Li, Y. Jiang and X. Wan, *Supramol. Chem.*, 2013, **25**, 269-275.
